# Supplementary material for: Single-cell atlas of the human neonatal small intestine affected by necrotizing enterocolitis
Source: PubMed Central journal article supplement (PMC10234541; doi:10.1371/journal.pbio.3002124), 2023-05-19

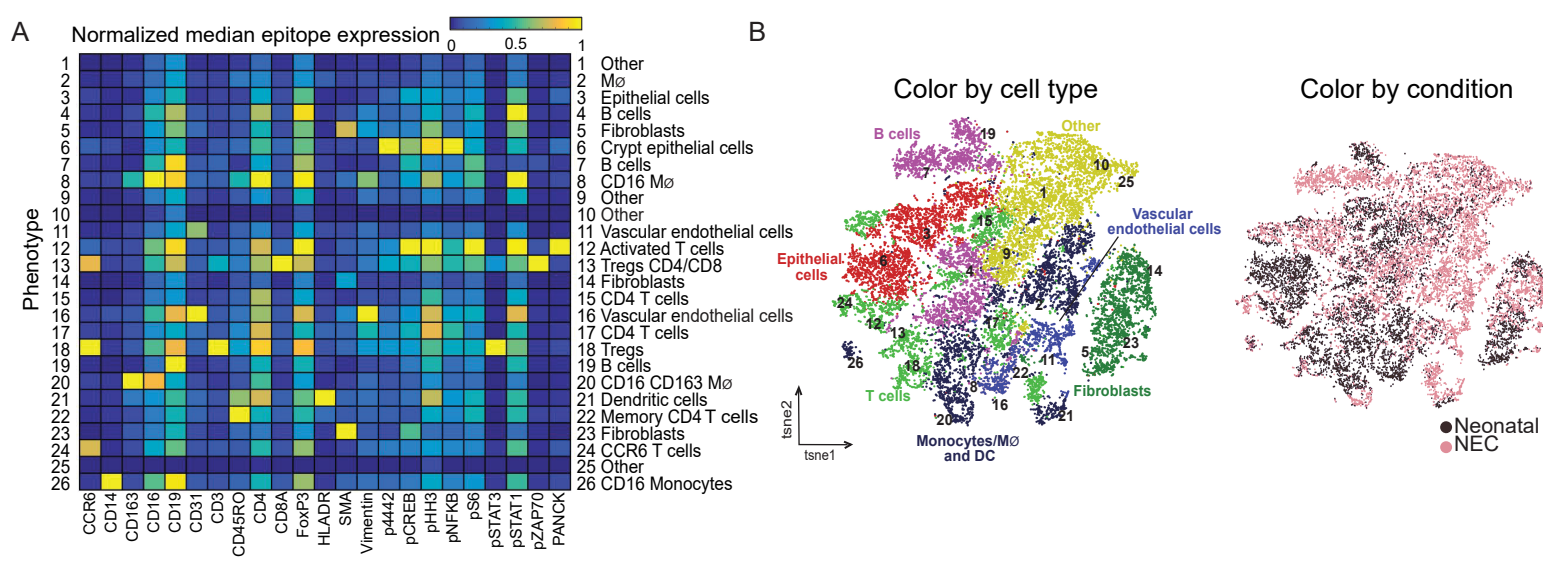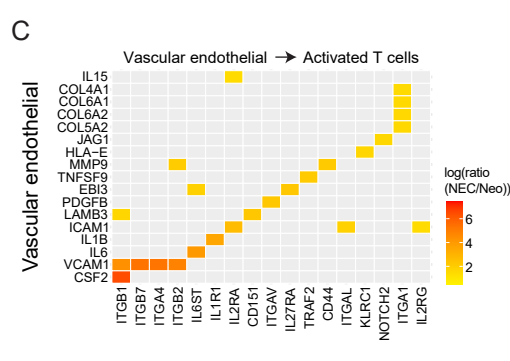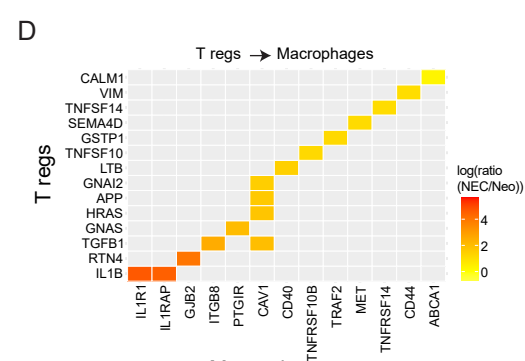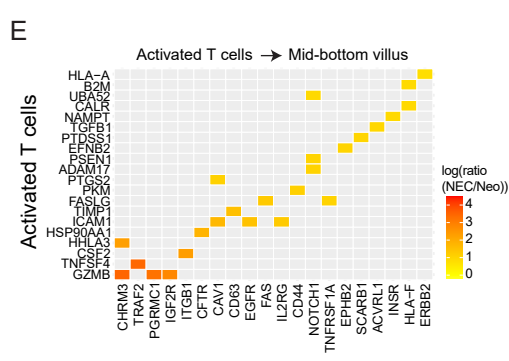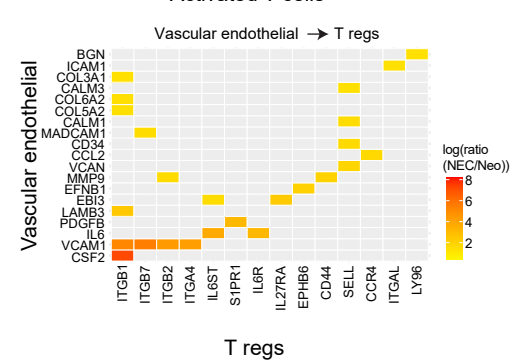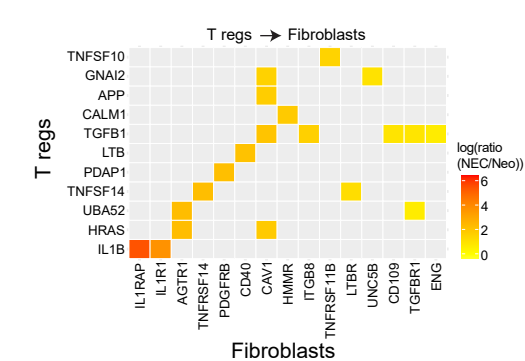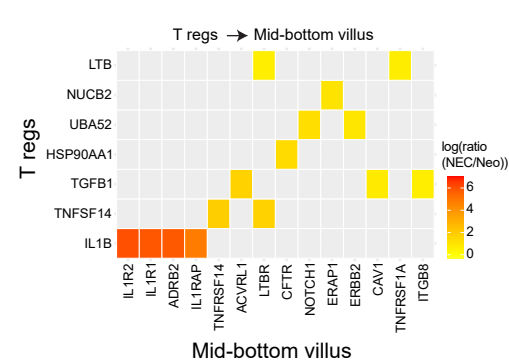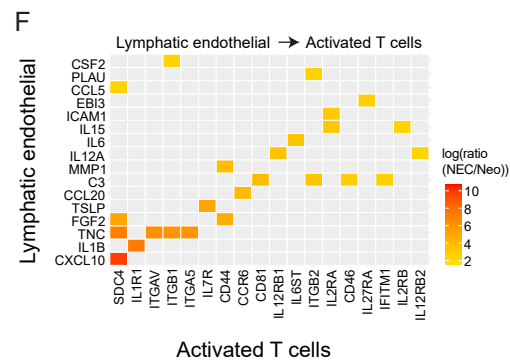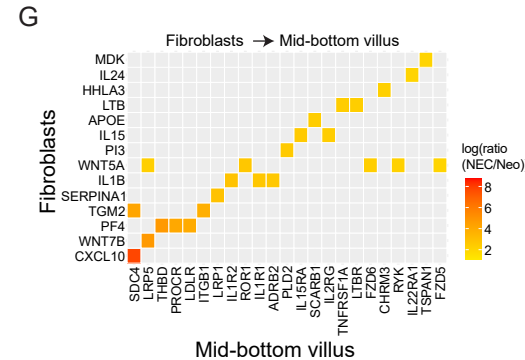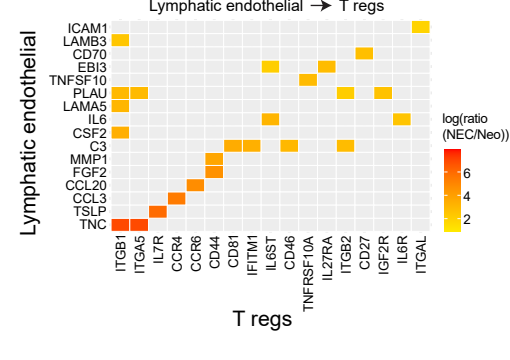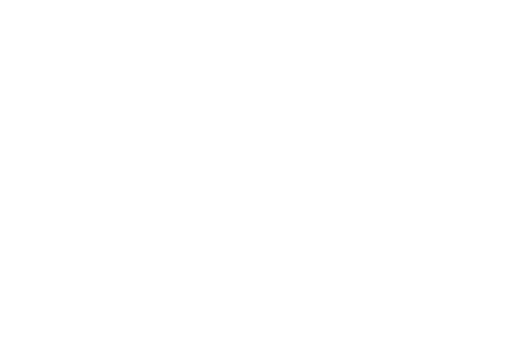

Supplement: pbio.3002124.s005.pdf [file pbio.3002124.s005.pdf]
